# Supplementary material for: Effects of SKCPT on Osteoarthritis in Beagle Meniscectomy and Cranial Cruciate Ligament Transection Models
Source: MDPI journal article supplement (doi:10.3390/ijms241914972), 2023-10-07
Supplement: s1 [file s1]

## Supplementary Figure & Tables

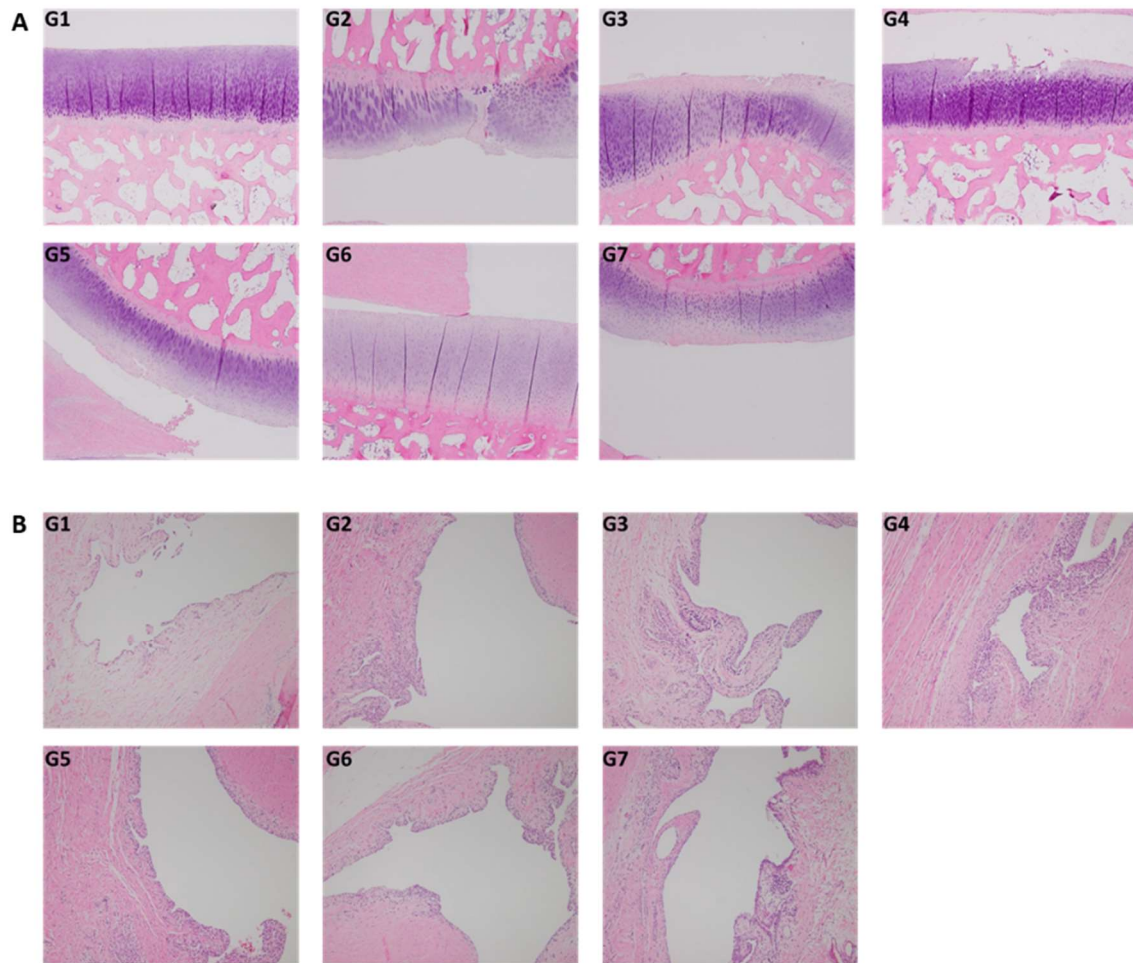

**Figure S1.** The results of histological examination in a canine model of OA. The paraffin-embedded tissue slides of cartilage or synovium were stained with H&E dye. For microscopic examination, a magnification of X40 was utilized for (A) cartilage, while a magnification of X100 was employed for (B) synovium. The total cartilage score and total synovial score were quantified and subsequently incorporated into the OARSI score. Data are expressed as Mean  $\pm$  S.D. Day of first test article administration was designated day 0. G1: Normal control, G2: Vehicle control, G3: Positive control, G4: 200 mg IR, G5: 300 mg IR, G6: 300 mg MR, G7: CR-1

**Table S1.** The criteria of gait evaluation.

| Score | Parameters                                                                     |
|-------|--------------------------------------------------------------------------------|
| 0     | No observable lameness                                                         |
| 1     | Intermittent, mild weight-bearing lameness with little, if any, change in gait |
| 2     | Moderate weight-bearing lameness—obvious lameness with noticeable gait change  |
| 3     | Severe weight-bearing lameness— “toe-touching” only                            |
| 4     | Non-weight-bearing                                                             |

**Table S2.** Grading of cartilage structure.

| Severity of Pathology Characteristics |                                                                                                        | Area of Section Affected |                       |                             |                  |
|---------------------------------------|--------------------------------------------------------------------------------------------------------|--------------------------|-----------------------|-----------------------------|------------------|
|                                       |                                                                                                        | None                     | Local<br>(Approx 1/3) | Multi-Focal<br>(Approx 2/3) | Global<br>(>2/3) |
| A                                     | Normal volume, smooth surface with all zones intact                                                    | 0                        | 0                     | 0                           | 0                |
| B                                     | Surface undulations including fissures in surface/upper zone and/or pannus tissue formation on surface | 0                        | 1                     | 2                           | 3                |
| C                                     | Fissures to mid-zone and/or erosion of surface/upper zone                                              | 0                        | 2                     | 4                           | 6                |
| D                                     | Fissures that extend to deep zone and/or erosion through mid-zone                                      | 0                        | 3                     | 6                           | 9                |
| E                                     | Full thickness loss of cartilage                                                                       | 0                        | 4                     | 8                           | 12               |

**Table S3.** Grading of chondrocyte pathology.

| Severity of Pathology Characteristics |                                                                                                      | Area of Section Affected |                       |                             |                  |
|---------------------------------------|------------------------------------------------------------------------------------------------------|--------------------------|-----------------------|-----------------------------|------------------|
|                                       |                                                                                                      | None                     | Local<br>(Approx 1/3) | Multi-Focal<br>(Approx 2/3) | Global<br>(>2/3) |
| A                                     | Normal                                                                                               | 0                        | 0                     | 0                           | 0                |
| B                                     | Loss of cells in the surface zone or relative increased density with occasional superficial clusters | 0                        | 1                     | 2                           | 3                |
| C                                     | Small cell clusters (2–4 cells/cluster) predominate                                                  | 0                        | 2                     | 4                           | 6                |
| D                                     | Large cell clusters ( $\geq 5$ cells/cluster) predominate                                            | 0                        | 3                     | 6                           | 9                |
| E                                     | Cell loss (necrosis/apoptosis) predominates                                                          | 0                        | 4                     | 8                           | 12               |

**Table S4.** Grading of proteoglycan staining.

| Severity of Pathology Characteristics |                                                      | Area of Section Affected |                       |                             |                  |
|---------------------------------------|------------------------------------------------------|--------------------------|-----------------------|-----------------------------|------------------|
|                                       |                                                      | None                     | Local<br>(Approx 1/3) | Multi-Focal<br>(Approx 2/3) | Global<br>(>2/3) |
| A                                     | Normal                                               | 0                        | 0                     | 0                           | 0                |
| B                                     | Decreased proteoglycan content in surface/upper zone | 0                        | 1                     | 2                           | 3                |
| C                                     | Decreased proteoglycan content into the mid-zone     | 0                        | 2                     | 4                           | 6                |
| D                                     | Decreased proteoglycan content into the deep zone    | 0                        | 3                     | 6                           | 9                |
| E                                     | Full depth decrease in proteoglycan content          | 0                        | 4                     | 8                           | 12               |

**Table S5.** Grading of lining cells characteristics.

| Severity of Pathology Characteristics |                     | Area of Section Affected |                       |                             |                  |
|---------------------------------------|---------------------|--------------------------|-----------------------|-----------------------------|------------------|
|                                       |                     | None                     | Local<br>(Approx 1/3) | Multi-Focal<br>(Approx 2/3) | Global<br>(>2/3) |
| A                                     | 1–2 layers of cells | 0                        | 0                     | 0                           | 0                |
| B                                     | 3–6 layers of cells | 0                        | 1                     | 2                           | 3                |
| C                                     | >6 layers of cells  | 0                        | 2                     | 4                           | 6                |

**Table S6.** Grading of cell infiltration characteristics.

| Severity of Pathology Characteristics |                                                                                   | Area of Section Affected |                       |                             |                  |
|---------------------------------------|-----------------------------------------------------------------------------------|--------------------------|-----------------------|-----------------------------|------------------|
|                                       |                                                                                   | None                     | Local<br>(Approx 1/3) | Multi-Focal<br>(Approx 2/3) | Global<br>(>2/3) |
| A                                     | No cellular infiltration                                                          | 0                        | 0                     | 0                           | 0                |
| B                                     | Mild to moderate inflammatory cell infiltrates including small lymphoid follicles | 0                        | 1                     | 2                           | 3                |
| C                                     | Marked, diffuse inflammatory cell infiltrates including large lymphoid follicles  | 0                        | 2                     | 4                           | 6                |

**Table S7.** Grading of hyperplasia characteristics.

| Severity of Pathology Characteristics |                         | Area of Section Affected |                       |                             |                  |
|---------------------------------------|-------------------------|--------------------------|-----------------------|-----------------------------|------------------|
|                                       |                         | None                     | Local<br>(Approx 1/3) | Multi-Focal<br>(Approx 2/3) | Global<br>(>2/3) |
| A                                     | No villous hyperplasia  | 0                        | 0                     | 0                           | 0                |
| B                                     | Short villi             | 0                        | 1                     | 2                           | 3                |
| C                                     | Finger-like hyperplasia | 0                        | 2                     | 4                           | 6                |
